# Supplementary material for: Efficacy of cancer-specific anti-podoplanin CAR-T cells and oncolytic herpes virus G47Δ combination therapy against glioblastoma
Source: PubMed Central journal article supplement (PMC9364057; doi:10.1016/j.omto.2022.07.006), 2022-07-20
Supplement: mmc1.pdf [file mmc1.pdf]

**Supplemental information**

**Efficacy of cancer-specific anti-podoplanin**

**CAR-T cells and oncolytic herpes virus G47 $\Delta$**

**combination therapy against glioblastoma**

**Lushun Chalise, Akira Kato, Masasuke Ohno, Sachi Maeda, Akane Yamamichi, Shunichiro Kuramitsu, Satoshi Shiina, Hiromi Takahashi, Sachiko Ozone, Junya Yamaguchi, Yukinari Kato, Yumi Rockenbach, Atsushi Natsume, and Tomoki Todo**

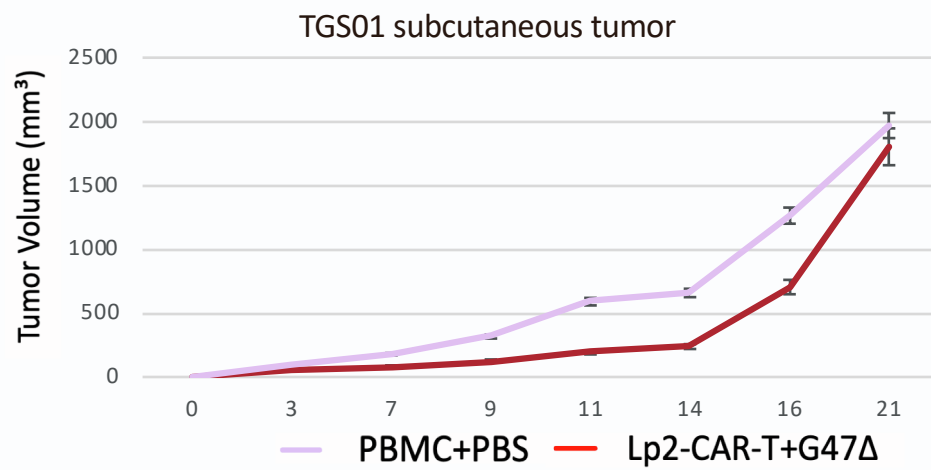

Figure S1. Against TGS01 subcutaneous tumors, the combination of Lp2-CAR-T cells and G47Δ slowed tumor growth for a short period, and it did not improve overall survival
